# Supplementary material for: Histone Deacetylase HDAC8 Promotes Insulin Resistance and β-Catenin Activation in NAFLD-Associated Hepatocellular Carcinoma
Source: Oxford University Press journal article supplement (doi:10.1158/0008-5472.can-14-3786), 2015-09-18
Supplement: 00085472can143786-sup-142978_2_supp_0_np4b0l.docx [file 00085472can143786-sup-142978_2_supp_0_np4b0l.docx]

**Supplemental Table S2. Clinicopathological information of the NAFLD-associated HCC patients.**

|  | |  |  |  |  |  |  |  |
| --- | --- | --- | --- | --- | --- | --- | --- | --- |
| **Patient no.** | **Sex** | **Age** | **Hep B** | **Hep C** | **Fatty liver** | **Diabetes** | **Hypertension** | **Dyslipidemia** |
| 350 | male | 72 | negative | negative | Yes | Yes | Yes | Yes |
| 394 | female | 36 | negative | negative | No | No | Yes | No |
| 419 | female | 78 | negative | negative | Yes | No | Yes | No |
| 465 | male | 58 | negative | negative | No | Yes | Yes | No |
| 600 | male | 64 | negative | negative | Yes | Yes | Yes | No |
| 606 | male | 78 | negative | negative | Yes | No | No | No |
| 651 | male | 69 | negative | negative | Yes | Yes | Yes | No |
| 666 | female | 59 | negative | negative | No | No | Yes | Yes |
| 678 | male | 58 | negative | negative | Yes | No | Yes | No |
| 696 | male | 51 | negative | negative | Yes | Yes | No | No |
| 705 | male | 75 | negative | negative | Yes | No | No | No |
| 707 | male | 71 | negative | negative | No | Yes | Yes | No |
| 717 | male | 58 | negative | negative | No | Yes | Yes | Yes |
| 739 | male | 85 | negative | negative | No | Yes | Yes | No |
| 741 | female | 74 | negative | negative | No | Yes | No | No |
| 754 | male | 74 | negative | negative | Yes | No | Yes | No |
| 759 | male | 60 | negative | negative | Yes | Yes | Yes | No |
| 768 | male | 55 | negative | negative | No | No | Yes | No |
| 778 | male | 59 | negative | negative | Yes | No | Yes | No |
| 784 | male | 64 | negative | negative | Yes | Yes | Yes | No |
| 796 | male | 67 | negative | negative | Yes | No | Yes | No |
| 797 | male | 55 | negative | negative | Yes | Yes | No | No |
| 833 | male | 62 | negative | negative | Yes | No | No | No |
| 853 | male | 74 | negative | negative | Yes | Yes | Yes | Yes |
